# Supplementary material
Source: Springer Nature journal article supplement (https://www.springermedizin.de/resource/supplementary/12992_2013_306_MOESM2_ESM.pdf/9616196)

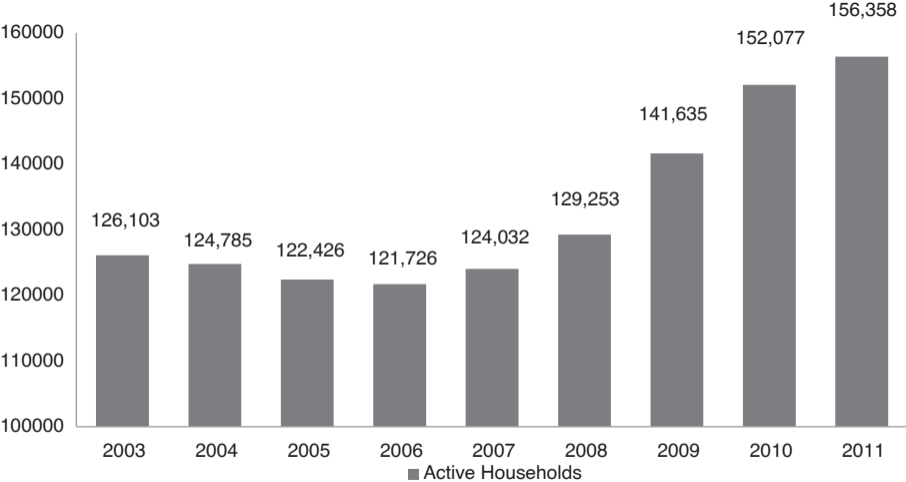

Source: Ontario Non-Profit Housing Association 2011

Supplement: MOESM2 [file 9616196]
